# Supplementary material for: Cryptic Marine Diversity in the Northern Arabian Gulf: An Integrative Approach Uncovers a New Species of Oyster (Bivalvia: Ostreidae), Ostrea oleomargarita
Source: Hindawi journal article supplement (doi:10.1155/2022/7058975), 2022-07-04
Supplement: f1 [file 7058975.f1.pdf]

# Supplementary File

*Journal of Zoological Systematics and Evolutionary Research*

## Cryptic marine diversity in the northern Arabian Gulf: an integrative approach uncovers a new species of oyster (Bivalvia: Ostreidae), *Ostrea oleomargarita*

Salvi D<sup>1</sup>, Al-Kandari M<sup>2</sup>, P. Oliver G<sup>3</sup>, Berrilli E<sup>1</sup>, Garzia M<sup>1</sup>.

<sup>1</sup> Department of Health, Life & Environmental Sciences - University of L'Aquila, Via Vetoio snc, 67100 L'Aquila-Coppito, Italy; <sup>2</sup> Ecosystem-Based Management of Marine Resources, Environment and Life Sciences Research Center, Kuwait Institute for Scientific Research, Hamad Al-Mubarak Street, Building 900004, Area 1, Ras Salmiya, Kuwait; <sup>3</sup> Honorary Research Fellow, National Museum of Wales, Cardiff, CF10 3NP.

CORRESPONDENCE: danielesalvi.bio@gmail.com

**Table S1** – Number of sequences, multiple sequence alignment length, and number of variable positions are reported for each gene and dataset (\*Parsimony informative sites are variable sites with the less frequent nucleotide occurring in at least two sequences).

| Gene fragment | N° sequences      |                   | Alignment length (bp) |                   | Variable sites (Parsimony informative*) |                   |
|---------------|-------------------|-------------------|-----------------------|-------------------|-----------------------------------------|-------------------|
|               | Ostreidae dataset | Ostreinae dataset | Ostreidae dataset     | Ostreinae dataset | Ostreidae dataset                       | Ostreinae dataset |
| COI           | 18                | 24                | 600                   | 600               | 322 (285)                               | 236 (209)         |
| 16S           | 21                | 28                | 445                   | 435               | 207 (176)                               | 127 (102)         |
| 28S           | 18                | 21                | 936                   | 916               | 302 (213)                               | 191 (110)         |
